# Supplementary material for: Deposition of luminescent Y2O3:Eu3+ on ferromagnetic mesoporous CoFe2O4@mSiO2 nanocomposites
Source: Royal Society of Chemistry journal article supplement (doi:10.1039/c3cp54488e), 2014-01-01
Supplement: c3cp54488e1.pdf [file c3cp54488e1.pdf]

## Electronic Supplementary Information

### Deposition of luminescence $\text{Y}_2\text{O}_3:\text{Eu}^{3+}$ on ferromagnetic mesoporous $\text{CoFe}_2\text{O}_4@m\text{SiO}_2$ nanocomposites

Xiaozhen Rena, Lizhu Tonga, Xiaodong Chena, Hong Dingb and Hua Yang\*, a

<sup>a</sup>College of Chemistry, Jilin University, Changchun, 130012, China

<sup>b</sup>State Key Laboratory of Inorganic Synthesis and Preparative Chemistry, College of Chemistry,

Jilin University, Changchun, 130012, PR China

\*Corresponding author

E-mail address: [huayang86@sina.com](mailto:huayang86@sina.com)

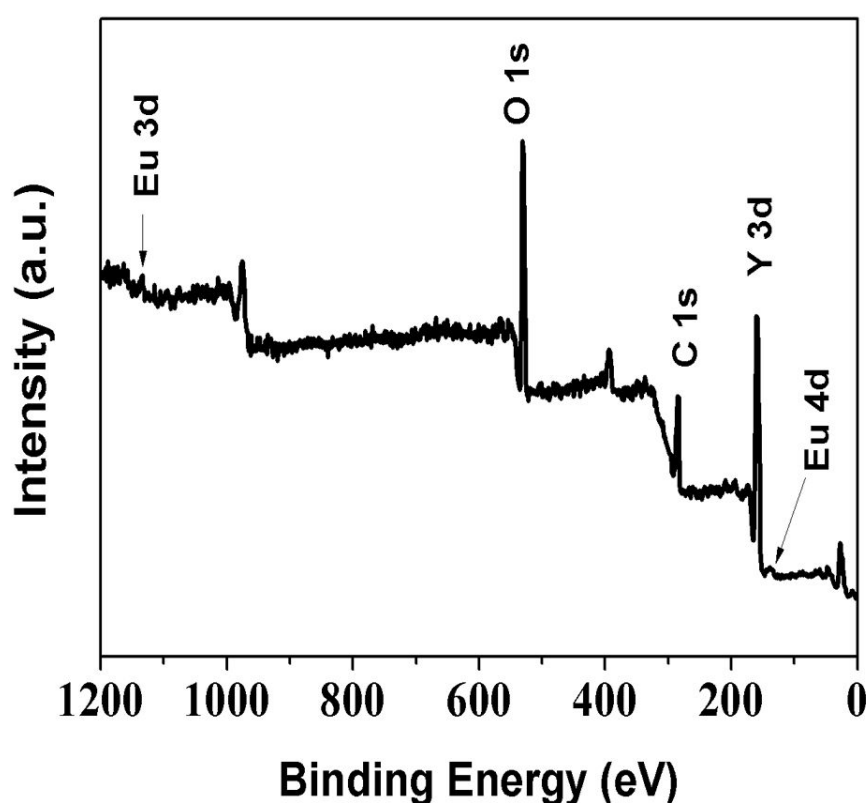

Fig. S1 XPS analysis of  $\text{CoFe}_2\text{O}_4@m\text{SiO}_2@Y_2\text{O}_3:\text{Eu}^{3+}$  composites

The binding energy of Fe, Co, and Si can't be detected in the XPS.

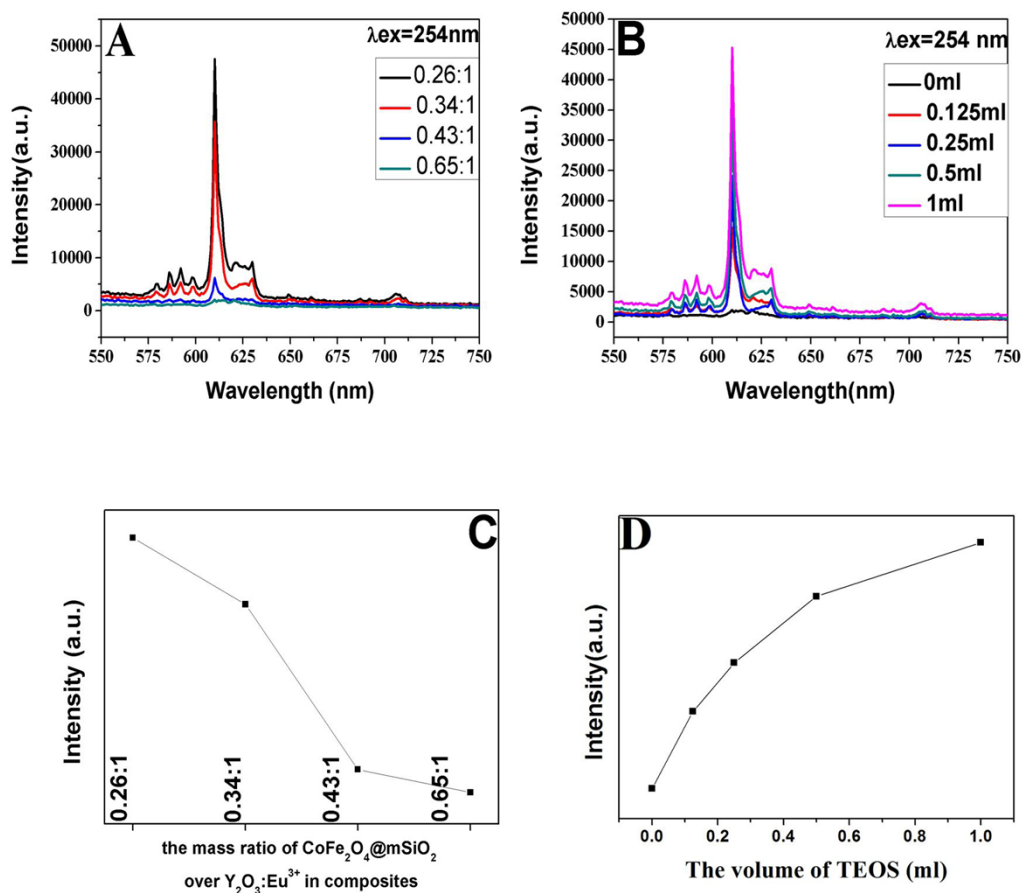

Fig. S2 The emission spectra of the composites (A) with different mass ratio of  $\text{CoFe}_2\text{O}_4@m\text{SiO}_2$  over  $\text{Y}_2\text{O}_3:\text{Eu}^{3+}$  in composites and (B) with different volume of TEOS and (C, D) the corresponding strongest emission peaks curve

Fig. S2A and C revealed that that the luminescent intensities declined with increasing mass ratio of  $\text{CoFe}_2\text{O}_4@m\text{SiO}_2$  over  $\text{Y}_2\text{O}_3:\text{Eu}^{3+}$ , which can be explained that more surface of  $\text{Y}_2\text{O}_3:\text{Eu}^{3+}$  will be contacted with the ferromagnetic  $\text{CoFe}_2\text{O}_4@m\text{SiO}_2$ . When the ratio is 0.65:1, weak luminescent intensity is observed. Fig. S2B and D indicate that the luminescent intensities of the composites decreased dramatically with the decrease of the volume of TEOS.
